# Supplementary material
Source: MDPI journal article supplement (https://www.mdpi.com/2073-4441/13/22/3232)
Supplement: s1 [file s1]

Type

# Nitrogen and Phosphorus Diffusion Fluxes: Insight from High-Resolution Technology and Hydrodynamic Modeling

Qingqing Sun <sup>1</sup>, Fu-Jun Yue <sup>1,\*</sup>, Jing-An Chen <sup>2</sup>, Jingfu Wang <sup>2,\*</sup>, Yulin Li <sup>3</sup>, Xiaozheng Li <sup>1</sup>, MohdAadil Bhat <sup>1</sup>, Jing Liu <sup>4</sup> and Si-Liang Li <sup>1</sup>

<sup>1</sup> Institute of Surface Earth System Science, School of Earth System Science, Tianjin University, Tianjin 300072, China; sunqingqing17@tju.edu.cn (Q.S.); lxz1998@tju.edu.cn (X.L.); aadilgeo@tju.edu.cn (M.B.); siliang.li@tju.edu.cn (S.-L.L.)

<sup>2</sup> State Key Laboratory of Environmental Geochemistry, Institute of Geochemistry, Chinese Academy of Sciences, Guiyang 550081, China; chen-jingan@vip.skleg.cn

<sup>3</sup> Environmental Protection Monitoring Station of Two Lakes and One Reservoir in Guiyang, Guiyang 551400, China; 36170589@qq.com

<sup>4</sup> School of Management Science, Guizhou University of Finance and Economics, Guiyang 550025, China; liujingaiskl@hotmail.com

\* Correspondence: fujun\_yue@tju.edu.cn (F.-J.Y.); wangjinfu@vip.skleg.cn (J.W.)

## Text S1

The forms of P were determined on dry samples by chemical sequential extraction [1]. Specifically, 500 mg sediment was 1) 1 M NH<sub>4</sub>Cl (NH<sub>4</sub>Cl-P, loosely adsorbed P), 2) 0.11 M Na<sub>2</sub>S<sub>2</sub>O<sub>4</sub>/0.11 M NaHCO<sub>3</sub> (BD-P, P forms sensitive to redox potentials, such as P bound on the surface of Fe(III) and Mn oxides and hydroxides), 3) 1 M NaOH (NaOH-SRP, exchangeable with hydroxide ions), which extracts the P fraction adsorbed on the surface of aluminum hydroxides and the interior of ferric oxides of the sediment particles, 4) The extract in Step 3) was digested with K<sub>2</sub>S<sub>2</sub>O<sub>8</sub> to measure TP, and the difference between 3) and 4) was NaOH-NRP, Microbial phosphorus, including detritus of organophosphorus and poly phosphorus, and humic acid compounds binding P, 5) 0.5 M HCl (HCl-P, Ca-bound fraction), which represents the amount of P found in Ca and Mg minerals, 6) The residual-P, consisting mainly of refractory P of the Si crystal lattice and organic P fraction. The extraction efficiency was 87% ~ 94%. The continuous extraction solution of Fe forms in sediment was selected as follows, including exchangeable form, carbonate bounded form, ferric and manganese oxide form, organic matter bounded form, and residual form [2].

Phosphate, NH<sub>4</sub><sup>+</sup>, and NO<sub>2</sub><sup>-</sup>, NO<sub>3</sub><sup>-</sup> concentrations in surface water, overlying water, pore water, and sediment in the extract were measured by molybdenum blue method [3], salicylic acid-

## Text S2

hypochlorite photometric method, N-(1-naphthalene) ethylene-diamine photometric method, ultraviolet spectrophotometry using Epoch Microplate Spectrophotometry (Biotech, USA), respectively [4, 5].  $\text{Fe}^{2+}$ ,  $\text{Mn}^{2+}$ , and  $\text{S}^{2-}$  concentrations in pore water in O-Phenanthroline spectrophotometric method, potassium periodate oxidation photometric method, and p-aminodimethylaniline photometric method [5].

There are four main kinds of sediment material diffusion and migration: molecular diffusion, dispersion, hydrodynamic wind and wave disturbance, and disturbance. In the mathematical model describing the material balance of modern lake sediments, molecular diffusion is the most important way for the dissolved components below the disturbed layer of sediments to be transported through pore water [6].

The porosity of sediments below the surface  $\varphi$ , Equation (S1).

$$\varphi = W_{wet}\omega / \rho V \quad (\text{S1})$$

Where  $w_{wet}$  is the wet weight of 5 cm surface sediment,  $\omega$  is moisture content,  $\rho$  is water density,  $1\text{g/cm}^3$ ,  $V$  is the volume of 5 cm surface sediment core (core diameter 5.9 cm). It had values between 0.90 and 0.96.

$D_s$  denotes the effective diffusion coefficient of ion in sediments, Equations (S2 and S3) [7].

$$D_s = D_o / \varphi f \quad (\text{S2})$$

$$f = 1 / \varphi^m \quad (\text{S3})$$

Where  $D_o$  is the ideal diffusion coefficient of the infinite dilution solution. The  $D_o$  value used in this study were 17.65 ( $\text{NH}_4^+$ ), 16.39 ( $\text{NO}_2^-$ ), 16.93 ( $\text{NO}_3^-$ ), 6.54 ( $\text{HPO}_4^{2-}$ ),  $10^{-6} \text{ cm}^2/\text{s}$  [7].  $f$  is the morphological hindrance factors in surface sediments, when  $\varphi \geq 0.7$ ,  $m=2.5-3$ , in this paper,  $m=3$ ,  $\varphi < 0.7$ ,  $m=2$  [8].

There is a linear relationship between  $D_o$  and temperature, Equations S4.

$$D_o(\text{HPO}_4^{2-}) = 7.34 + 0.16(T - 25) \quad (\text{S4})$$

Where  $T$  is the temperature at SWI, the unit was K.

Diffusion flux from SWI,  $R_{diffusion}$ , Equations (S5):

$$R_{diffusion} = \sum F_i \cdot A_i \quad (\text{S5})$$

Settling flux,  $R_{settling}$ , Equations (S6):

$$R_{settling} = \sum A_i \cdot k_s \cdot C_{s,i} \quad (\text{S6})$$

Where  $F_i$  is the  $i$ th diffusion flux represented by the  $i$ th sampling point,  $A_i$  is the area represented by the  $i$ th sampling point,  $C_{s,i}$  was the C, N and P concentration at the surface sediment of the  $i$ th sampling point.

## Text S3

Some main reactions among OM, O<sub>2</sub>, P, N, Fe, Mn, S [9].

Aerobic respiration:

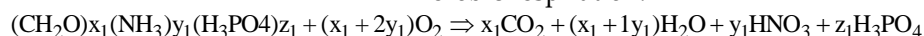

Manganese reduction:

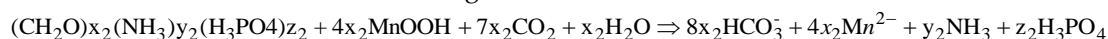

Nitrate reduction:

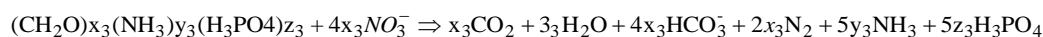

Iron reduction:

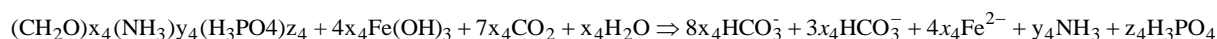

Sulfate reduction:

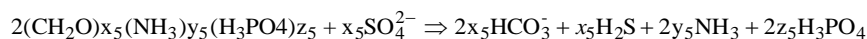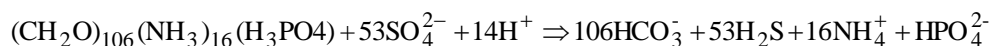

When NO<sub>3</sub><sup>-</sup>, NO<sub>2</sub><sup>-</sup> and Mn(IV) are depleted, Fe(III) are reduced by the microbial iron reduction coupled with OM as the electron donor and chemical iron reduction coupled with S<sup>2-</sup> as the electron donor which is produced by SO<sub>4</sub><sup>2-</sup> reduction [10].

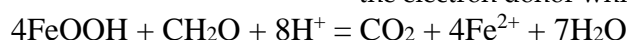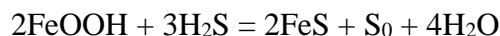

Methane fermentation:

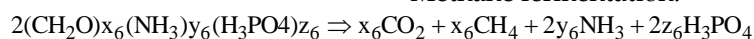

FeS dissolved product smaller than MnS, OM decomposition H<sub>2</sub>S priority and Fe(II) in combination with FeS is generated, the top 4 cm dissolved Fe content is close to zero, the dissolved iron was unused, the excess H<sub>2</sub>S with Mn(II), Fe content increased from 4cm, the bivalent iron overload, hydrogen sulfide, and iron combination generated FeS, small solubility product, hydrolysis of S<sup>2-</sup> cannot be checked out.

Sulfurization (sulfur oxidation):

Colourless sulfur bacteria, e.g., filamentous sulfur bacteria, *Beggiata*, *Thiothrix*, *Thiospira*, *Sulfolobus*, *Thiovulum*.

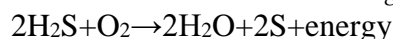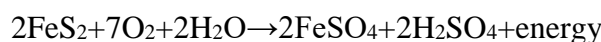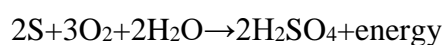

Colored sulfur bacteria, which contains chlorophyll and can carry on the photosynthesis, e.g., *Chromatiaceae*, *Chlorobiaceae*, *Rhodospirillaceae*, *Rhodobacter spheroides* and *R. palustris*.

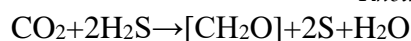

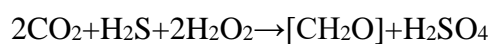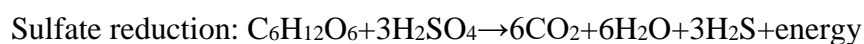

Sulfur reduction

The chemical iron reduction process produces solid

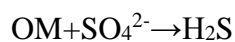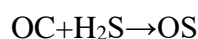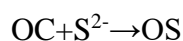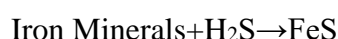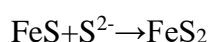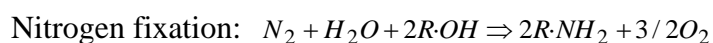

Ammonification: Proteins in granular organic nitrogen are mineralized to peptides and amino acids under the action of heterotrophic bacteria.

Nitrification:

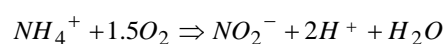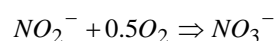

Nitrite bacteria and nitrate bacteria are both aerobic autotrophic bacteria.

Michaelis-Menten Equation is the basic expression of enzyme reaction [11], Michaelis constant of nitrate bacteria is  $16\mu\text{M O}_2$ , that of nitrite bacteria is  $62\mu\text{M O}_2$ . Heterotrophic nitrifying bacteria nitrogen-oxidizing organic compounds and inorganic ammonia compounds that require additional organic matter [12] and could react when oxygen is very low, and are more important than autotrophic nitrifying bacteria. Denitrification can occur when sufficient organic matter is present.

Denitrification is an important source of greenhouse gases in the atmosphere,  $\text{N}_2\text{O}$  especially.

The optimum pH is 7-8 and the limit is 6 ~ 9.5.

Denitrification: Facultative anaerobic heterotrophic microorganisms

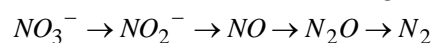

Nitrate nitrogen reduced to ammonia nitrogen: obligate anaerobic bacteria.

**Table S1.** Characteristics of the 24 water sampling sites and 6 sediment sampling sites.

| Sites                   | Longitude (° E) | Latitude (° N) | Water depth (m) | Sediment thickness (m) |
|-------------------------|-----------------|----------------|-----------------|------------------------|
| 24 water sampling sites |                 |                |                 |                        |
| 1                       | 106.3878        | 26.45111       | 13              |                        |
| 2                       | 106.3872        | 26.45028       | 12              |                        |
| 3                       | 106.3772        | 26.44861       | 11              |                        |
| 4                       | 106.3775        | 26.44278       | 9               |                        |
| 5                       | 106.3847        | 26.43861       | 1               |                        |
| 6                       | 106.3892        | 26.46667       | 10              |                        |
| 7                       | 106.3939        | 26.47611       | 19              |                        |
| 8                       | 106.4028        | 26.48306       | 12              |                        |
| 9                       | 106.4211        | 26.4725        | 1               |                        |
| 10                      | 106.4175        | 26.48944       | 7               |                        |
| 11                      | 106.4236        | 26.48944       | 21              |                        |
| 12                      | 106.4253        | 26.50250       | 9               |                        |
| 13                      | 106.4253        | 26.51111       | 23              |                        |
| 14                      | 106.4244        | 26.52306       | 30              |                        |
| 15                      | 106.4242        | 26.52639       | 1               |                        |
| 16                      | 106.3997        | 26.54611       | 31              |                        |
| 17                      | 106.3942        | 26.54611       | 11              |                        |
| 18                      | 106.3994        | 26.54722       | 16              |                        |

|                           |          |          |    |      |
|---------------------------|----------|----------|----|------|
| 19                        | 106.3894 | 26.54889 | 13 |      |
| 20                        | 106.4106 | 26.54472 | 24 |      |
| 21                        | 106.4208 | 26.54806 | 12 |      |
| 22                        | 106.4194 | 26.55000 | 22 |      |
| 23                        | 106.4194 | 26.55028 | 35 |      |
| 24                        | 106.4194 | 26.53361 | 33 |      |
| 6 sediment sampling sites |          |          |    |      |
| HF1                       | 106.412  | 26.481   | 17 | 0.44 |
| HF2                       | 106.405  | 26.546   | 18 | 0.76 |
| HF3                       | 106.44   | 26.507   | 4  | 1.05 |
| HF4                       | 106.425  | 26.515   | 28 | 0.6  |
| HF5                       | 106.423  | 26.523   | 10 | 0.44 |
| HF6                       | 106.414  | 26.550   | 36 | 0.34 |

**Table S2.** Hydrodynamic and temperature modules parameter of Hongfeng Lake in EFDC[13-18].

| Index                                                                  | Parameter                                                      |
|------------------------------------------------------------------------|----------------------------------------------------------------|
| <b>Turbulent diffusion</b>                                             |                                                                |
| Horizontal kinematic eddy viscosity and diffusivity                    | Smagorinsky with Wall Drag and WC Diffusion (Wall Z0=0.002)    |
| Background/constant horizontal eddy viscosity (AHO, m <sup>2</sup> /s) | 10                                                             |
| Horizontal momentum diffusivity (AHD, dimensionless)                   | 0.15                                                           |
| Wall roughness                                                         | 0.002                                                          |
| Large cell aspect ratio (m/m)                                          | 0                                                              |
| <b>Vertical eddy viscosity and diffusivity</b>                         |                                                                |
| Time advance filter                                                    | Square root $T=((t-1)*t)^{0.5}$                                |
| Vertical eddy viscosity(AVO, m <sup>2</sup> /s)                        | 10 <sup>-6</sup>                                               |
| Vertical molecular diffusivity (ABO, m <sup>2</sup> /s)                | 10 <sup>-8</sup>                                               |
| Max. kinematic eddy viscosity(AVMX, m <sup>2</sup> /s)                 | 10 <sup>-6</sup>                                               |
| Max. eddy diffusivity(ABMX, m <sup>2</sup> /s)                         | 10 <sup>-8</sup>                                               |
| Vertical turbulent limiting options                                    | Limit length scale and limit RIQMAX                            |
| Wall Proximity Function                                                | No wall proximity effects on turbulence                        |
| Sub-options for standard scheme                                        | Galperin et al., stability functions                           |
| <b>Roughness</b>                                                       | 0.035                                                          |
| <b>Wetting and drying options</b>                                      | Use wetting/drying with non-linear iterations and face masking |
| Dry depth (m)                                                          | 0.04                                                           |
| Dry step                                                               | 10                                                             |

|                                                                                                                  |                                      |
|------------------------------------------------------------------------------------------------------------------|--------------------------------------|
| Boundary condition withdrawal wet depth(m)                                                                       | 0.15                                 |
| <b>Timing/linkage</b>                                                                                            |                                      |
| Time step(seconds)                                                                                               | 0.754                                |
| <b>Dynamic time step options</b>                                                                                 |                                      |
| Safety factor                                                                                                    | 0                                    |
| #Ramp-up loops                                                                                                   | 1000                                 |
| Maximum dH/dT                                                                                                    | 0                                    |
| Growth step                                                                                                      | 2                                    |
| Maximum time step                                                                                                | 30                                   |
| <b>Initial condition for water temperatures (°C)</b>                                                             | 26.23 on 1 July, 10.5 on 1 January   |
| <b>Initial condition for bed temperatures</b>                                                                    |                                      |
| Uniformbed temperature (°C)                                                                                      | 16                                   |
| Uniform thermal thickness (m)                                                                                    | 12                                   |
| <b>Surface heat exchange</b> sub-model                                                                           | equilibrium temp (CE-QUAL-W2 method) |
| Solar radiation absorbed in the surface layer Minimum fraction absorbed in the top layer                         | 0.3                                  |
| Light extinction coefficients in units of 1 m per g/m <sup>3</sup> unless otherwise specified (EFDC+) Background | 0.45                                 |
| <b>General</b>                                                                                                   |                                      |
| Bed heat exchange coefficients,heat transfer coefficient W/m <sup>2</sup> /°C                                    | 0.3                                  |
| Convective heat transfer coefficient                                                                             | 0                                    |



Evaporation Options (water balance only)

Using evaporation and rainfall from ASER

---

**Table S3.** Sample points information for verification and input data.

| Reservoir/inflow | Name             | Part       | Site name | Latitude<br>(° N) | Longitude<br>(° E) | Distance from<br>dam/m |
|------------------|------------------|------------|-----------|-------------------|--------------------|------------------------|
| Reservoir area   | Hongfeng Lake    | North part | H1        | 26.508            | 106.425            | 6500.9                 |
| Reservoir area   | Hongfeng Lake    | North part | H2        | 26.523            | 106.438            | 6232.65                |
| Reservoir area   | Hongfeng Lake    | North part | H3        | 26.53             | 106.431            | 2441.05                |
| Reservoir area   | Hongfeng Lake    | South part | H4        | 26.55             | 106.422            | 451.42                 |
| Reservoir area   | Hongfeng Lake    | South part | H5        | 26.549            | 106.387            | 4091.95                |
| Reservoir area   | Hongfeng Lake    | South part | H6        | 26.555            | 106.348            | 9258.47                |
| Inflow           | Taohuayuan River | South part | HZ1       | 26.532            | 106.331            | 11676.84               |
| Inflow           | Yangchang River  | North part | HZ2       | 26.433            | 106.360            | 19062.28               |
| Inflow           | Houliu River     | North part | HZ3       | 26.436            | 106.432            | 19712.2                |
| Inflow           | Maxian River     | North part | HZ4       | 26.410            | 106.377            | 20988.88               |
| Inflow           | Maibao River     | North part | HZ5       | 26.570            | 106.395            | 4277.3                 |

**Table S4.** Verification of temperature module of Hongfeng Lake by EFDC and measured data.

|           |   | Surface water |        |        |        | Middle water |        |        |        | Bottom water |        |        |        |
|-----------|---|---------------|--------|--------|--------|--------------|--------|--------|--------|--------------|--------|--------|--------|
|           |   | April         | April  | July   | July   | April        | April  | July   | July   | April        | April  | July   | July   |
| H1        | S |               |        | 25.9   | 26.1   |              |        |        |        |              |        | 25.9   | 26.1   |
| H1        | M |               |        | 25.2   | 25.0   |              |        |        |        |              |        | 24.8   | 24.8   |
| H2        | S |               |        | 25.1   | 26.1   |              |        |        |        |              |        |        |        |
| H2        | M |               |        | 25.2   | 25.    |              |        |        |        |              |        |        |        |
| H3        | S | 16.9          | 16.6   | 26.0   | 26.6   | 16.9         | 16.6   | 26.0   | 26.6   | 16.9         | 16.6   | 26.0   | 26.6   |
| H3        | M | 15.3          | 15.3   | 25.4   | 25.6   | 15.7         | 15.3   | 25.2   | 25.3   | 13.8         | 15.2   | 25.0   | 25.3   |
| H4        | S | 15.3          | 15.9   | 25.8   | 26.1   | 15.3         | 15.9   | 25.8   | 26.1   | 15.3         | 15.9   | 25.8   | 26.1   |
| H4        | M | 15.5          | 15.4   | 25.3   | 25.3   | 15.3         | 15.4   | 25.2   | 25.3   | 15.4         | 15.3   | 24.8   | 24.5   |
| H5        | S | 16.7          | 17.0   | 26.5   | 26.5   | 16.7         | 17.0   | 26.5   | 26.5   | 16.7         | 17.0   | 26.5   | 26.5   |
| H5        | M | 15.6          | 15.4   | 25.3   | 25.3   | 15.4         | 15.4   | 25.2   | 25.2   | 15.2         | 15.3   | 25.3   | 25.3   |
| H6        | S | 15.8          | 15.0   | 25.1   | 26.2   |              |        |        |        | 15.8         | 15.0   | 25.1   | 26.2   |
| H6        | M | 15.8          | 15.8   | 26.2   | 25.4   |              |        |        |        | 15.8         | 15.8   | 25.9   | 25.1   |
| Deviation |   |               |        |        |        |              |        |        |        |              |        |        |        |
| H1        |   |               |        | -0.026 | -0.042 |              |        |        |        |              |        | -0.042 | -0.050 |
| H2        |   |               |        | 0.006  | -0.029 |              |        |        |        |              |        |        |        |
| H3        |   | -0.094        | -0.078 | -0.023 | -0.03  | -0.070       | -0.078 | -0.031 | -0.049 | -0.183       | -0.084 | -0.038 | -0.049 |
| H4        |   | 0.016         | -0.029 | -0.018 | -0.031 | 0.003        | -0.029 | -0.022 | -0.031 | 0.010        | -0.036 | -0.037 | -0.061 |
| H5        |   | -0.067        | -0.094 | -0.046 | -0.046 | -0.079       | -0.094 | -0.050 | -0.050 | -0.091       | -0.100 | -0.046 | -0.046 |

|    |       |       |       |        |  |       |       |       |        |
|----|-------|-------|-------|--------|--|-------|-------|-------|--------|
| H6 | 0.000 | 0.051 | 0.045 | -0.029 |  | 0.000 | 0.051 | 0.033 | -0.040 |
|----|-------|-------|-------|--------|--|-------|-------|-------|--------|

---

Note: S means simulation value, M means measured value. There are some missing measured data.

**Table S5.** Concentration in sediment, deposit rate, enrichment degree in sediment, release flux of N and P at the sediment-water interface in Hongfeng Lake.

| Elements | Hongfeng reservoir                                                |                                            |                                              |                                                              |                                             |                                                                   |                                                                    |                                                                         |                                                                           |                                                                            |
|----------|-------------------------------------------------------------------|--------------------------------------------|----------------------------------------------|--------------------------------------------------------------|---------------------------------------------|-------------------------------------------------------------------|--------------------------------------------------------------------|-------------------------------------------------------------------------|---------------------------------------------------------------------------|----------------------------------------------------------------------------|
|          | Concentra-<br>tion in sedi-<br>ment [19]/%<br>(min-<br>max(mean)) | Degree<br>of en-<br>rich-<br>ment<br>[19]* | Total<br>amount<br>in sedi-<br>ment/<br>Mmol | Average<br>Deposit<br>rate<br>mol/(m <sup>2</sup> ·ye<br>ar) | Average<br>Deposit<br>rate<br>Mmol/ye<br>ar | Concentration in<br>surface sediment<br>in front of the<br>dam/ % | Degree of en-<br>richment in<br>front of the<br>dam <sup>(a)</sup> | Flux release<br>from SWI<br>10 <sup>-9</sup><br>nmol/cm <sup>2</sup> /s | Release<br>amount of<br>DAM from<br>SWI at sum-<br>mer <sup>(b)</sup> mol | Flux at 5 cm depth<br>sediment<br>10 <sup>-9</sup> nmol/cm <sup>2</sup> /s |
| TN       | 0.25-0.36<br>(0.28)                                               | 4.45                                       | 1,341.7                                      | 1.56 [19],<br>0.34                                           | 19.448                                      | 0.48-0.70<br>(0.56)                                               | 8.90                                                               |                                                                         |                                                                           |                                                                            |
| TP       | 0.10-0.22<br>(0.14)                                               | 2.6                                        | 287.8                                        | 0.077                                                        | 4.391                                       | 0.18-0.19<br>(0.18)                                               | 3.34                                                               | 3,321.36                                                                | 547.98                                                                    | 3,656.46                                                                   |

Note:(a) means the ratio of the average value of lake sediments to the soil background value in China. (b) means area=207,5601 m<sup>2</sup>.

**Table S6.** Porosity  $\phi$ , diffusion coefficient  $D_s$ , diffusion flux of  $\text{NH}_4^+$ ,  $\text{NO}_3^-$ , labile P surface sediment concentration, deposited fluxes of N and P, and the contribution rate of diffusion flux on the overlying water and sediment in Hongfeng Lake.

| Parameter                                                                           | July            |                 |                |               |                |                  |           |
|-------------------------------------------------------------------------------------|-----------------|-----------------|----------------|---------------|----------------|------------------|-----------|
|                                                                                     | HF1             | HF2             | HF3            | HF4           | HF5            | HF6              | Total     |
| $t_w$ (yr <sup>-1</sup> )                                                           | 0.82            | 0.82            | 0.82           | 0.82          | 0.82           | 0.82             |           |
| H (m)                                                                               | 17              | 18              | 4              | 28            | 10             | 36               |           |
| $\phi$                                                                              | 0.788~0.967     | 0.780~0.947     | 0.805~0.966    | 0.785~0.942   | 0.675~0.810    | 0.943~0.980      |           |
| $k_s$ (ng cm <sup>-2</sup> s <sup>-1</sup> )                                        | 16.211          | 6.274           | 4.86           | 11.495        | 8.579          | 8.917            |           |
| $k_s$ (g cm <sup>-2</sup> yr <sup>-1</sup> )                                        | 0.512           | 0.198           | 0.153          | 0.3625        | 0.271          | 0.281            |           |
| $A_i$ (km <sup>2</sup> )                                                            | 7.6             | 4.13            | 5.84           | 6.1           | 3.84           | 6.61             |           |
| $C_o$ (NH <sub>4</sub> <sup>+</sup> , mg/L)                                         | 1.279           | 1.785           | 0.710          | 1.769         | 0.271          | 4.014            |           |
| $D_{s-NH_4^+}$ (10 <sup>-6</sup> cm <sup>2</sup> s <sup>-1</sup> )                  | 10.96           | 10.987~15.829   | 11.438~16.470  | 10.876~15.662 | 8.042~11.58    | 10.904~15.695    |           |
| $F_{w-NH_4^+}$ (10 <sup>-6</sup> nmol cm <sup>-2</sup> s <sup>-1</sup> )            | -36.95          | 229.976         | 17.666         | -95.993       | 4.251          | -270.688         |           |
| $F_{s-NH_4^+}$ (10 <sup>-6</sup> nmol cm <sup>-2</sup> s <sup>-1</sup> )            | -36.950~110.844 | -20.254~229.976 | -20.060~23.270 | -95.993~5.843 | -24.324~4.251  | -270.688~164.767 |           |
| $F_{Diffusion-NH_4^+}$ (10 <sup>-6</sup> nmol<br>cm <sup>-2</sup> s <sup>-1</sup> ) | -36.950~110.844 | -20.254~229.976 | 20.060~18.447  | -95.993~1.300 | -24.324~64.105 | -270.688~519.968 |           |
| Total NH <sub>4</sub> <sup>+</sup> -N diffusion<br>flux(kg/summer)                  | 2,232.001       | 2,735.964       | 248.399        | -2,295.722    | 448.002        | 4,106.684        | 7,475.327 |
| $C_{NH_4^+}$ (%)                                                                    | 0.0102          | 0.1425          | 0.01245        | 0.00705       | 0.0405         | 0.2175           |           |
| $F_{deposited-NH_4^+}$ (nmol cm <sup>-2</sup><br>s <sup>-1</sup> )                  | 0.0118          | 0.0639          | 0.00432        | 0.00579       | 0.0248         | 0.138            |           |

|                                                                                        |                      |                   |                   |                   |                      |                   |              |
|----------------------------------------------------------------------------------------|----------------------|-------------------|-------------------|-------------------|----------------------|-------------------|--------------|
| Total $\text{NH}_4^+$ -N deposited<br>flux(kt/summer)                                  | 0.714                | 2.096             | 0.201             | 0.281             | 0.758                | 7.279             | 11.327       |
| <i>Contribution</i> <sub>Overlying, <math>\text{NH}_4^+</math></sub>                   | -0.0050~-0.015       | -0.0019~-0.021    | -0.0210~-0.0193   | -0.0058~-0.000078 | -0.027~-0.070        | -0.0056~-0.011    |              |
| <i>Contribution</i> <sub>Sediment, <math>\text{NH}_4^+</math></sub>                    | -0.00313~-0.00938    | -0.000317~-0.0036 | -0.00464~-0.00427 | -0.0166~-0.000225 | -0.000980~-0.00258   | -0.00195~-0.00375 |              |
| $C_o(\text{NO}_3^-, \text{mg/L})$                                                      | 5.790                | 2.055             | 5.596             | 4.350             | 5.790                | 5.520             |              |
| $D_{s-\text{NO}_3^-}$ ( $10^{-6} \text{ cm}^2 \text{ s}^{-1}$ )                        | 10.513~15.820        | 10.539~15.183     | 10.971~15.798     | 10.423~15.023     | 7.714~11.108         | 10.459~15.055     |              |
| $F_{w-\text{NO}_3^-}$ ( $10^{-6} \text{ nmol cm}^{-2} \text{ s}^{-1}$ )                | -4,621.552           | 175.657           | -12.615           | -183.863          | -2,557.02~-589.694   | -700.636          |              |
| $F_{s-\text{NO}_3^-}$ ( $10^{-6} \text{ nmol cm}^{-2} \text{ s}^{-1}$ )                | -1,138.729~1,591.854 | -155.52~1,665.424 | -11.562~692.79    | -525.659~-15.468  | -81.995~1,418.177    | -811.256~458.451  |              |
| $F_{\text{Diffusion}-\text{NO}_3^-}$ ( $10^{-6} \text{ nmol cm}^{-2} \text{ s}^{-1}$ ) | -5,111.985~1591.854  | 20.138~1,665.425  | -24.178~692.79    | -525.659~-199.23  | -2,585.350~1,418.177 | -953.585~458.451  |              |
| Total $\text{NO}_3^-$ -N diffusion<br>flux(kg/summer)                                  | -93,815.217          | 21,099.627        | 15,228.267        | -17,576.517       | -14,217.468          | -22,879.926       | -112,161.234 |
| $C_{\text{NO}_3^-}$ (%)                                                                | 0.0026               | 0.0597            | 0.0086            | 0.0050            | 0.0872               | 0.0041            |              |
| $F_{\text{deposited}-\text{NO}_3^-}$ ( $\text{nmol cm}^{-2} \text{ s}^{-1}$ )          | 0.0031               | 0.0268            | 0.0030            | 0.0041            | 0.0534               | 0.0026            |              |
| <i>Contribution</i> <sub>Overlying, <math>\text{NO}_3^-</math></sub>                   | -0.15~-0.048         | 0.0016~-0.13      | -0.00321~-0.09188 | -0.0049~-0.013    | -0.13~-0.073         | -0.014~-0.0068    |              |
| <i>Contribution</i> <sub>Sediment, <math>\text{NO}_3^-</math></sub>                    | -1.670~-0.520        | -0.0922~-0.00112  | -0.00811~-0.232   | -0.129~-0.0489    | -0.0484~-0.265       | -0.0062~-0.129    |              |



|                                                                              |              |              |             |             |               |             |        |
|------------------------------------------------------------------------------|--------------|--------------|-------------|-------------|---------------|-------------|--------|
| $C_{IN}$ (%)                                                                 | 0.0128       | 0.2022       | 0.0210      | 0.0120      | 0.1277        | 0.2216      |        |
| $F_{deposited-IN}$ (nmol cm <sup>-2</sup> s <sup>-1</sup> )                  | 0.0149       | 0.0906       | 0.0073      | 0.0099      | 0.0783        | 0.1411      |        |
| $Contribution_{Overlying,IN}$                                                | -0.1784      | 0.0855       | 0.0392      | -0.0482     | -0.0531       | -0.0421     |        |
| $Contribution_{Sediment,IN}$                                                 | -0.1019      | 0.0080       | 0.0457      | -0.0416     | -0.00576      | -0.00253    |        |
| $C_{ON}$ (%)                                                                 | 0.0860       | 0.3963       | 0.0739      | 0.0804      | 0.2023        | 0.5030      |        |
| $F_{deposited-ON}$ (nmol cm <sup>-2</sup> s <sup>-1</sup> )                  | 0.0995       | 0.1776       | 0.0256      | 0.0660      | 0.1240        | 0.3204      |        |
| $C_{TN}$ (%)                                                                 | 0.0988       | 0.5985       | 0.0949      | 0.0924      | 0.3300        | 0.7246      |        |
| Total NO <sub>3</sub> <sup>-</sup> -N deposited<br>flux(kt/summer)           | 0.185        | 0.878        | 0.138       | 0.198       | 1.631         | 0.137       | 3.167  |
| Total ON deposited flux(kt/summer)                                           | 6.013        | 5.830        | 1.190       | 3.200       | 3.784         | 16.833      | 36.851 |
| Total N deposited flux(kt/summer)                                            | 6.911        | 8.805        | 1.529       | 3.679       | 6.172         | 24.249      | 51.345 |
| $C_o$ (PO <sub>4</sub> <sup>3-</sup> , mg/L)                                 | 0.186        | 0.196        | 0.213       | 0.188       | 0.171         | 0.215       |        |
| $D_{s-P}$ (10 <sup>-6</sup> cm <sup>2</sup> s <sup>-1</sup> )                | 4.061~6.111  | 3.984~5.865  | 4.238~6.103 | 4.030~5.803 | 4.415~4.291   | 4.040~6.276 |        |
| $F_{w-HPO_4^{2-}}$ (10 <sup>-6</sup> nmol cm <sup>-2</sup> s <sup>-1</sup> ) | -3.015~3.401 | -8.183~4.871 | 1.721       | -           | 10.336~95.092 | 7.468~9.691 |        |

|                                                                         |                                                |                   |                                     |                                     |                                   |                  |           |
|-------------------------------------------------------------------------|------------------------------------------------|-------------------|-------------------------------------|-------------------------------------|-----------------------------------|------------------|-----------|
| $F_{s-HPO_4^{2-}}$ ( $10^{-6}$ nmol $cm^{-2}$ s <sup>-1</sup> )<br>1)   | 1.771~4.482                                    | -2.043~61.096     | 0.111~0.936                         | 1.766                               | -6.906~2.563                      | 2.131~8.199      |           |
| $F_{Diffusion-HPO_4^{2-}}$ ( $10^{-6}$ nmol $cm^{-2}$ s <sup>-1</sup> ) | 1.247~1.771                                    | -3.329~65.967     | 0.111~2.657                         | 0.59~5.167                          | 0.857~88.188                      | -0.262~15.667    |           |
| Total P release flux(kg/summer)                                         | 90.717                                         | 501.620           | 59.697                              | 139.572                             | 778.751                           | 426.585          | 1,996.942 |
| $C_{DIP}$ (%)                                                           | 0.0469                                         | 0.0340            | 0.0233                              | 0.0553                              | 0.0266                            | 0.00531          |           |
| $F_{deposited-IP}$ (nmol $cm^{-2}$ s <sup>-1</sup> )<br>1)              | 0.0245                                         | 0.00688           | 0.00365                             | 0.0205                              | 0.00736                           | 0.00153          |           |
| $C_{TP}$ (%)                                                            | 0.136                                          | 0.145             | 0.0721                              | 0.193                               | 0.0798                            | 0.0620           |           |
| $F_{deposited-TP}$ (nmol $cm^{-2}$ s <sup>-1</sup> )<br>1)              | 0.0712                                         | 0.0294            | 0.01131                             | 0.0717                              | 0.0221                            | 0.0179           |           |
| $C_{OP}$ (%)                                                            | 0.0889                                         | 0.11121158        | 0.0488                              | 0.138                               | 0.0532                            | 0.0567           |           |
| $F_{deposited-OP}$ (nmol $cm^{-2}$ s <sup>-1</sup> )<br>1)              | 0.0465                                         | 0.0225            | 0.00766                             | 0.0511                              | 0.0147                            | 0.0163           |           |
| $Contribution_{Overlying, HPO_4^{2-}}$                                  | 0.0026~0.0038                                  | -0.0016~0.025     | 0.00085~0.020                       | 0.00074~0.0064                      | 0.00042~0.339                     | -0.0002~0.0133   |           |
| $Contribution_{Sediment, HPO_4^{2-}}$                                   | $5.08 \times 10^{-5} \sim 7.22 \times 10^{-5}$ | -0.000484~0.00959 | $3.04 \times 10^{-5} \sim 0.000299$ | $2.87 \times 10^{-5} \sim 0.000251$ | $1.48 \times 10^{-5} \sim 0.0120$ | -0.000171~0.0102 |           |
| Total $PO_4^{3-}$ deposited<br>flux(kt/summer)                          | 1.482                                          | 0.226             | 0.169                               | 0.996                               | 0.225                             | 0.080            | 3.178     |

|                                    |       |       |       |       |       |       |        |
|------------------------------------|-------|-------|-------|-------|-------|-------|--------|
| Total OP deposited flux(kt/summer) | 2.812 | 0.740 | 0.356 | 2.479 | 0.450 | 0.858 | 7.694  |
| Total TP deposited flux(kt/summer) | 4.301 | 0.964 | 0.525 | 3.475 | 0.675 | 0.938 | 10.878 |

---

Note: Diffusion fluxes were calculated (1) the pore water tested is obtained by centrifugation and filtration after cutting sediments at 1 cm intervals, (2) the pore water tested is obtained by DGT technique at 0.2 cm intervals. + means the molecule released from pore water to overlying water, - means the molecule diffused from overlying water to pore water.

**Table S7.** Velocity and total bed shear at HF1~HF6, Hongfeng Lake, in winter (W) and summer (S) (mean±standard deviation).

| Sites                                                | Year | Season | HF1        | HF2        | HF3         | HF4        | HF5        | HF6         |
|------------------------------------------------------|------|--------|------------|------------|-------------|------------|------------|-------------|
| Velocity of water at depth of 0.5 m ( $10^{-2}$ m/s) | 2013 | W      | 5.24±3.42  | 7.40±5.53  | 4.04±1.92   | 3.60±2.41  | 5.43±2.44  | 4.82±5.62   |
|                                                      | 2017 | W      | 4.20±3.13  | 8.16±4.32  | 4.79±1.61   | 3.60±1.61  | 5.64±2.90  | 4.43±2.72   |
|                                                      | 2013 | S      | 12.42±3.31 | 11.21±5.32 | 4.74±2.43   | 8.31±4.30  | 16.42±3.45 | 16.90±10.52 |
|                                                      | 2017 | S      | 8.86±3.55  | 14.65±6.12 | 5.09±0.30   | 11.48±4.8  | 14.49±4.09 | 22.43±11.34 |
| Bottom Velocity ( $10^{-2}$ m/s)                     |      |        |            |            |             | 3          |            |             |
|                                                      | 2013 | W      | 3.42±1.50  | 2.71±1.68  | 1.66±0.95   | 2.62±1.24  | 1.67±0.83  | 1.40±1.41   |
|                                                      | 2017 | W      | 3.75±1.11  | 3.62±1.40  | 2.50±1.21   | 3.11±1.14  | 1.66±0.93  | 1.65±0.78   |
|                                                      | 2013 | S      | 2.13±0.51  | 6.18±2.62  | 2.46±1.65   | 3.15±1.77  | 5.62±1.34  | 5.81±2.59   |
| Average velocity ( $10^{-2}$ m/s)                    | 2017 | S      | 2.51±0.87  | 6.21±3.02  | 0.73±0.53   | 1.43±1.11  | 3.90±1.58  | 4.92±2.29   |
|                                                      | 2013 | W      | 0.75±0.49  | 0.82±1.73  | 0.80±0.53   | 1.75±0.90  | 1.19±0.91  | 0.50±1.64   |
|                                                      | 2017 | W      | 0.97±0.63  | 0.98±0.68  | 1.05±0.71   | 2.11±0.81  | 2.19±1.49  | 0.53±0.23   |
|                                                      | 2013 | S      | 1.00±0.36  | 2.41±1.41  | 1.90±0.82   | 2.11±1.16  | 2.59±1.47  | 0.74±0.52   |
| Horizontal velocity ( $10^{-2}$ m/s)                 | 2017 | S      | 0.91±0.28  | 2.45±1.38  | 1.17±0.79   | 1.17±0.48  | 1.23±0.50  | 0.88±0.44   |
|                                                      | 2013 | W      | 0.74±0.46  | 0.74±0.44  | 0.80±0.53   | 1.74±0.90  | 1.18±0.91  | 0.41±0.20   |
|                                                      | 2017 | W      | 0.95±0.63  | 0.98±0.68  | 1.05±0.71   | 2.11±0.81  | 2.19±1.49  | 0.53±0.23   |
|                                                      | 2013 | S      | 1.00±0.36  | 2.41±1.41  | 1.90±0.82   | 2.11±1.16  | 2.59±1.47  | 0.74±0.52   |
| Vertical velocity ( $10^{-4}$ m/s)                   | 2017 | S      | 0.91±0.28  | 2.45±1.38  | 1.17±0.79   | 1.17±0.48  | 0.92±0.73  | 0.88±0.44   |
|                                                      | 2013 | W      | 2.81±1.48  | 14.04±8.09 | -0.071±1.15 | -0.29±1.04 | -2.8±1.72  | 2.5±1.31    |
|                                                      | 2017 | W      | 2.67±2.78  | 12.96±9.02 | -0.70±1.80  | 0.29±0.28  | -1.83±1.38 | 2.90±1.67   |

|                                                |      |   |           |            |            |            |            |            |
|------------------------------------------------|------|---|-----------|------------|------------|------------|------------|------------|
| Total bed shear ( $10^{-2}$ N/m <sup>2</sup> ) | 2013 | S | 3.81±3.12 | 24.53±9.10 | -1.74±2.52 | -2.03±2.41 | -9.08±3.21 | 2.48±3.91  |
|                                                | 2017 | S | 3.53±1.73 | 27.99±5.37 | 0.89±2.88  | -6.20±1.95 | -8.81±2.54 | 2.73±1.96  |
|                                                | 2013 | W | 3.68±2.69 | 2.31±1.53  | 1.34±1.39  | 3.33±2.76  | 1.69±1.13  | 0.70±0.61  |
|                                                | 2017 | W | 3.92±2.10 | 3.88±2.48  | 3.19±2.89  | 4.56±3.29  | 1.68±1.50  | 0.86±0.59  |
|                                                | 2013 | S | 1.45±0.63 | 11.65±7.94 | 3.39±3.42  | 5.08±4.39  | 13.17±5.25 | 11.67±9.11 |
|                                                | 2017 | S | 1.74±1.87 | 11.53±7.73 | 3.62±7.12  | 1.46±2.15  | 4.23±2.32  | 8.13±5.54  |

---

Note: - refereed to negative direction in sigma three-dimensional coordinate.

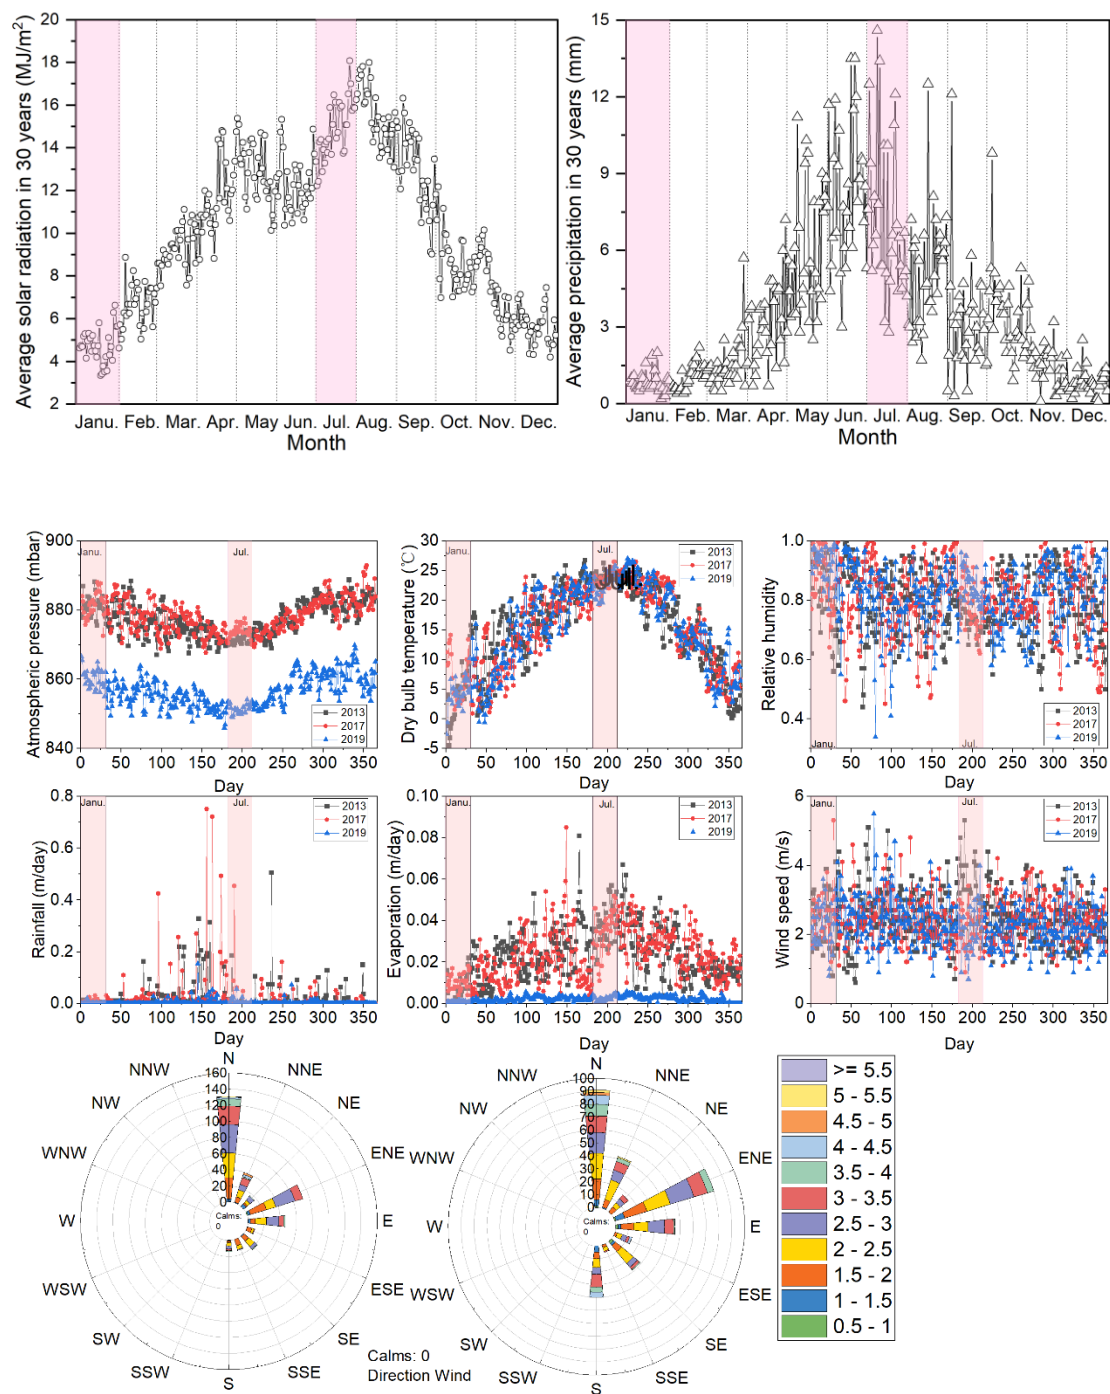

**Figure S1.** Average solar radiation and precipitation in 30 years. Data was obtained from Greenhouse Data (<http://data.sheshiyuanyi.com/WeatherData/>). Atmospheric pressure, dry bulb temperature, relative humidity, rainfall, evaporation, wind speed and wind direction in 2013, 2017 and 2019. Data was obtained from National Meteorological Science Data Center (<https://data.cma.cn/>). There were also the interannual difference.

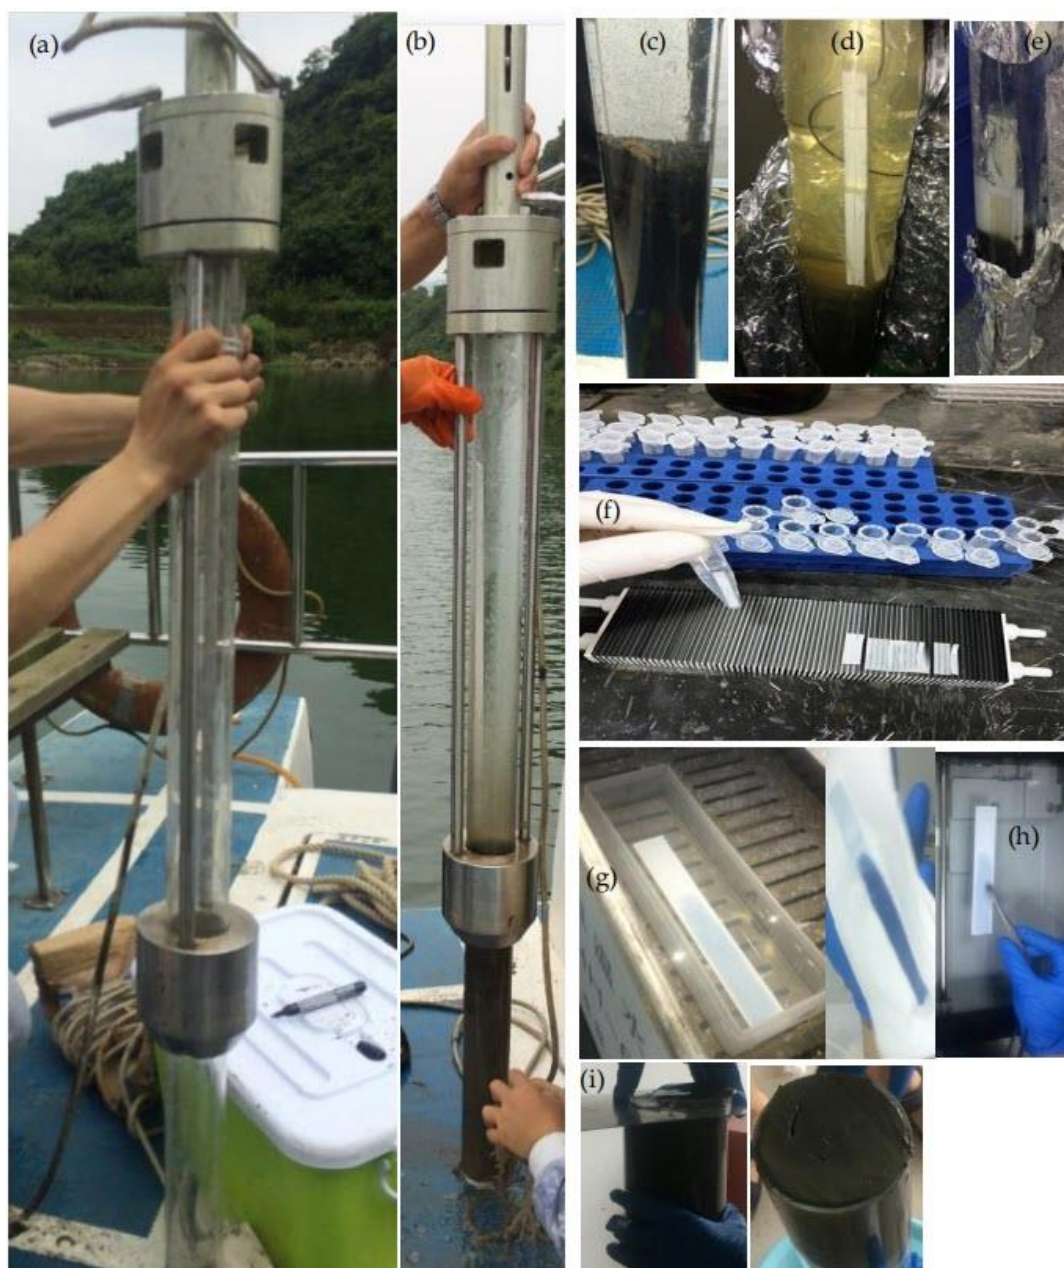

**Figure S2.** Sediment core sampling, storage, and treatment. (a) portable sediment sampler, (b) Sediment cores collected with a portable sediment sampler, (c) clear sediment-water interface, (d, e) DGT technology devices added at sediment-water interface, (f) films of ZrO-AT devices cut with 2-mm interval by the ceramic knife, (g) color film of ZrO device by molybdenum antimony color reagent in winter, (h) the thin film of ZrO scanned in a scanner, (i) sediment cut with 1-cm interval.

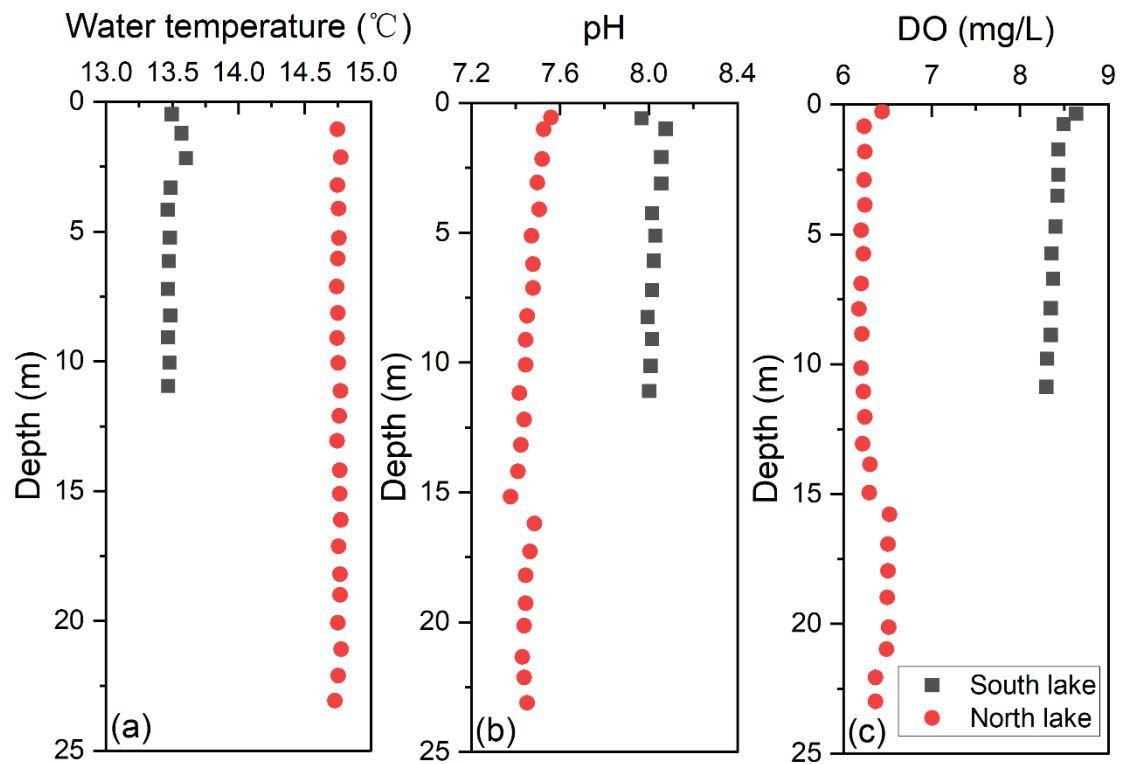

**Figure S3.** Water temperature(a), pH (b), and DO (c) of water profiles in Hongfeng Lake in winter.



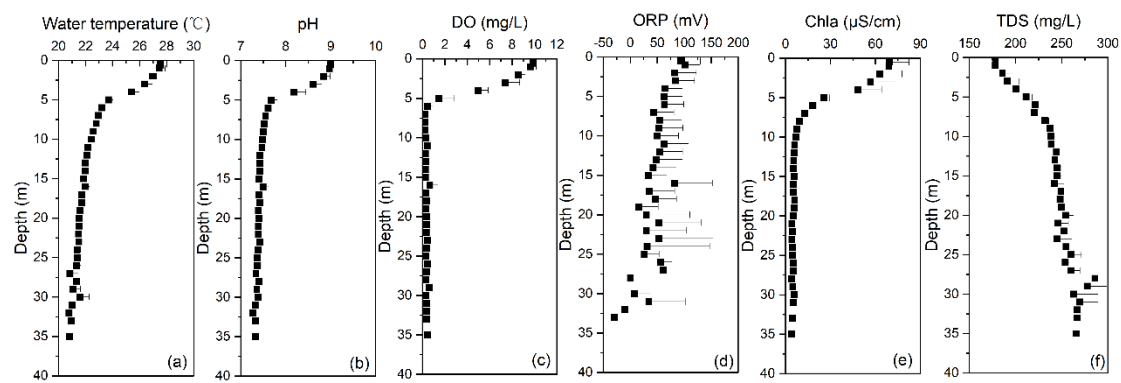

**Figure S4.** Water temperature(a), pH (b), DO (c), ORP (d), Chlorophyll (e), and TDS (f) of water profiles in Hongfeng Lake in summer.

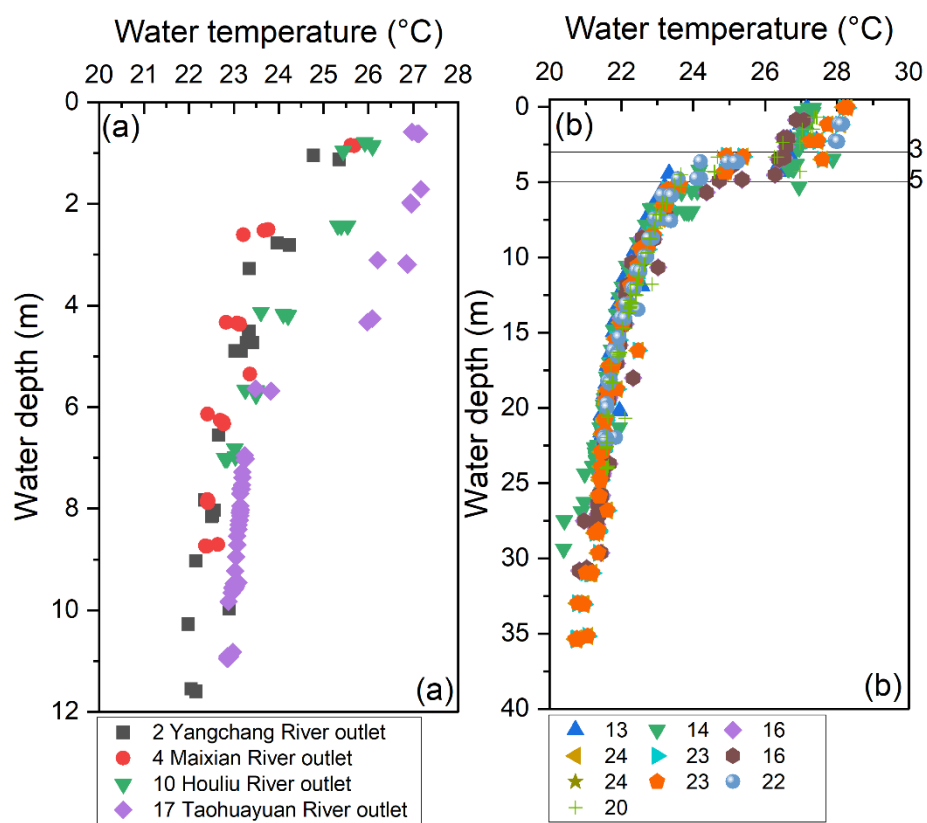

**Figure S5.** Water temperature of river outlets(a) and still water zone (b) of water profiles in Hongfeng Lake in summer.

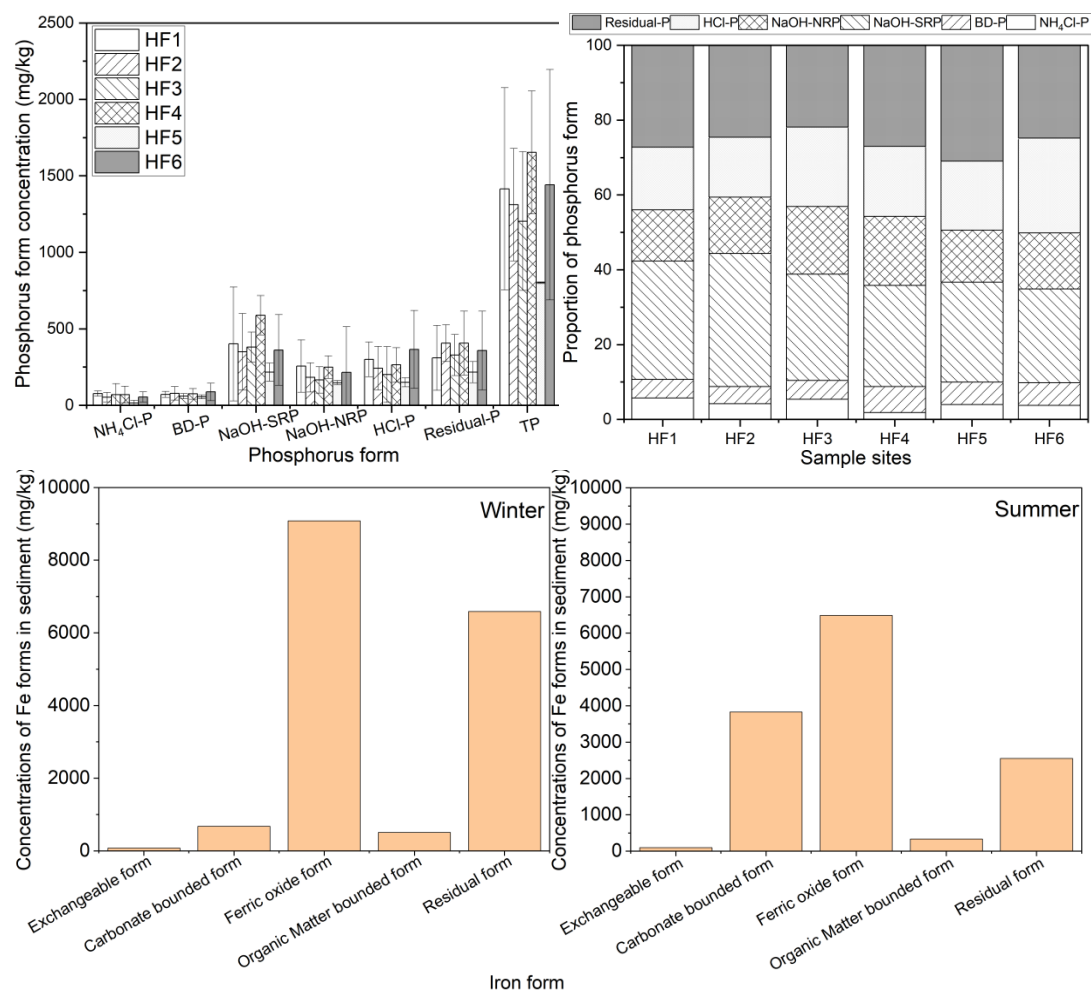

**Figure S6.** P and Fe concentration and proportion of surface sediment of Hongfeng Lake.

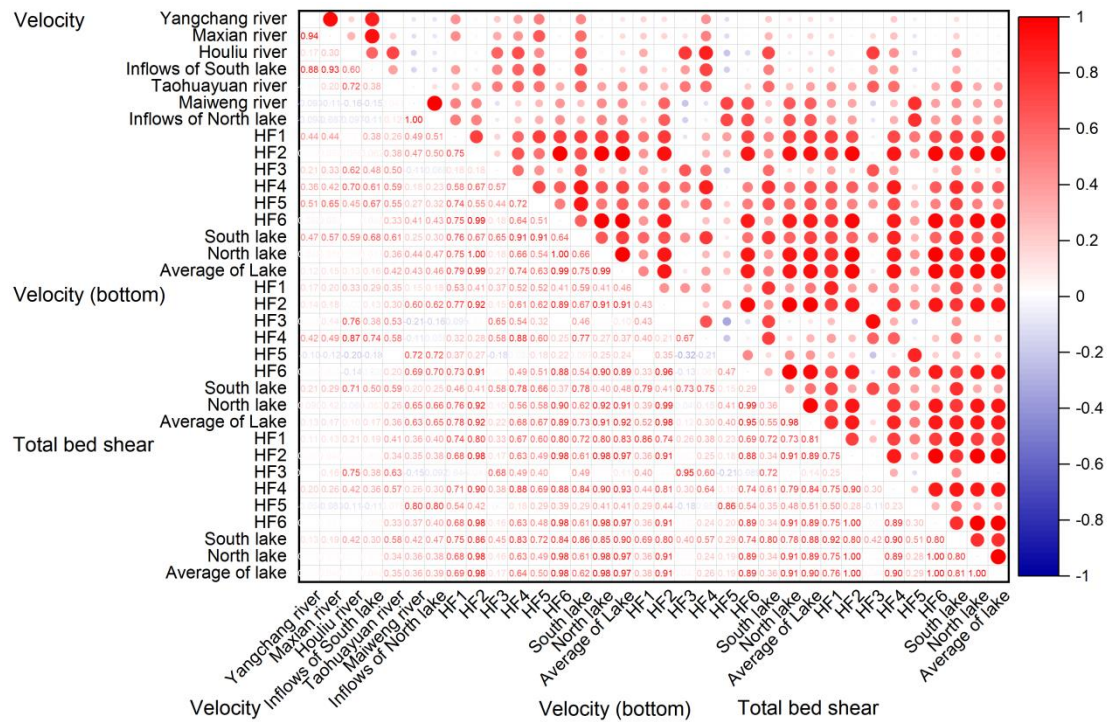

**Figure S7.** Correlation analysis among inflow, lake water velocity and total bed shear. Yangchang river, Maxian river, Houliu river, HF1, HF3, HF4, and HF5 were in South lake, Taohuayuan river, Maiweng river, HF2, and HF6 were in North lake.

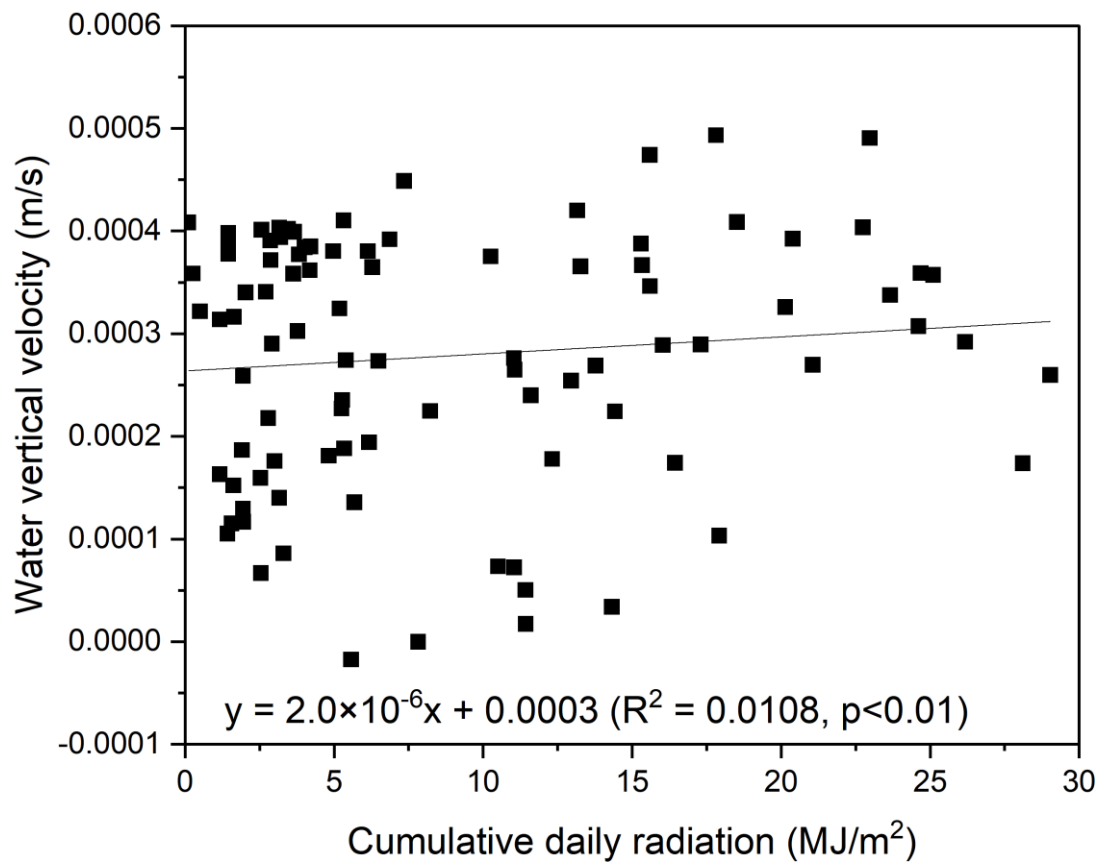

**Figure S8.** Linear relationship between water vertical velocity and cumulative daily radiation.

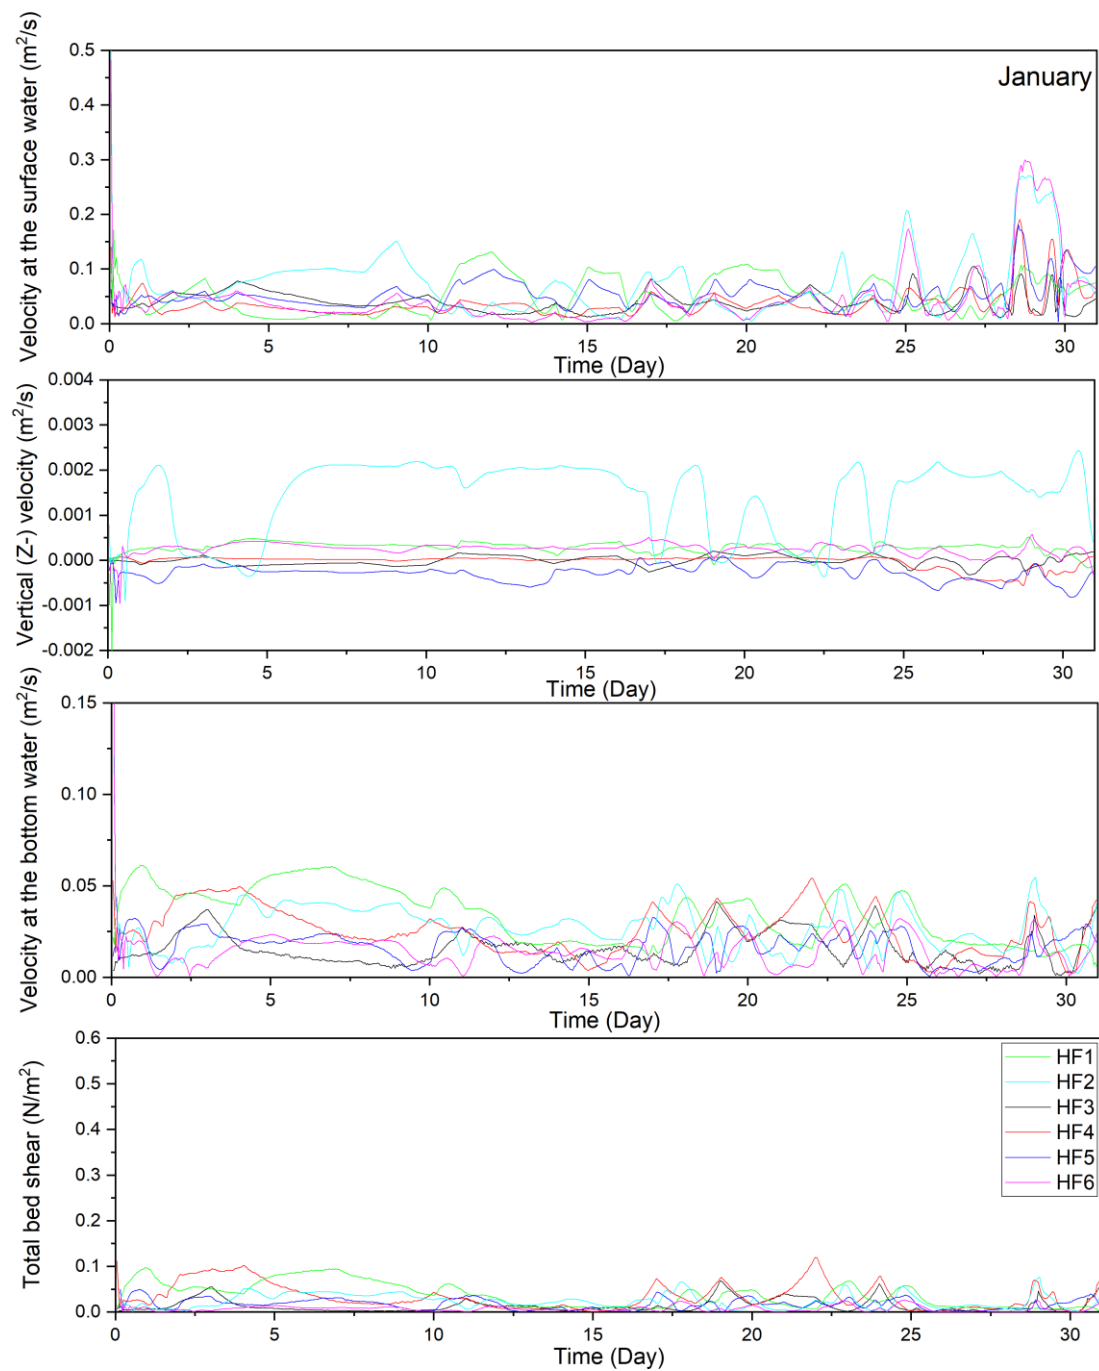

**Figure S9.** The simulated velocity magnitude of surface water, the vertical velocity, bottom water, and total bed shear in sample sites in January of LFY. The legend from top to bottom showed HF1~ 6 in turn.

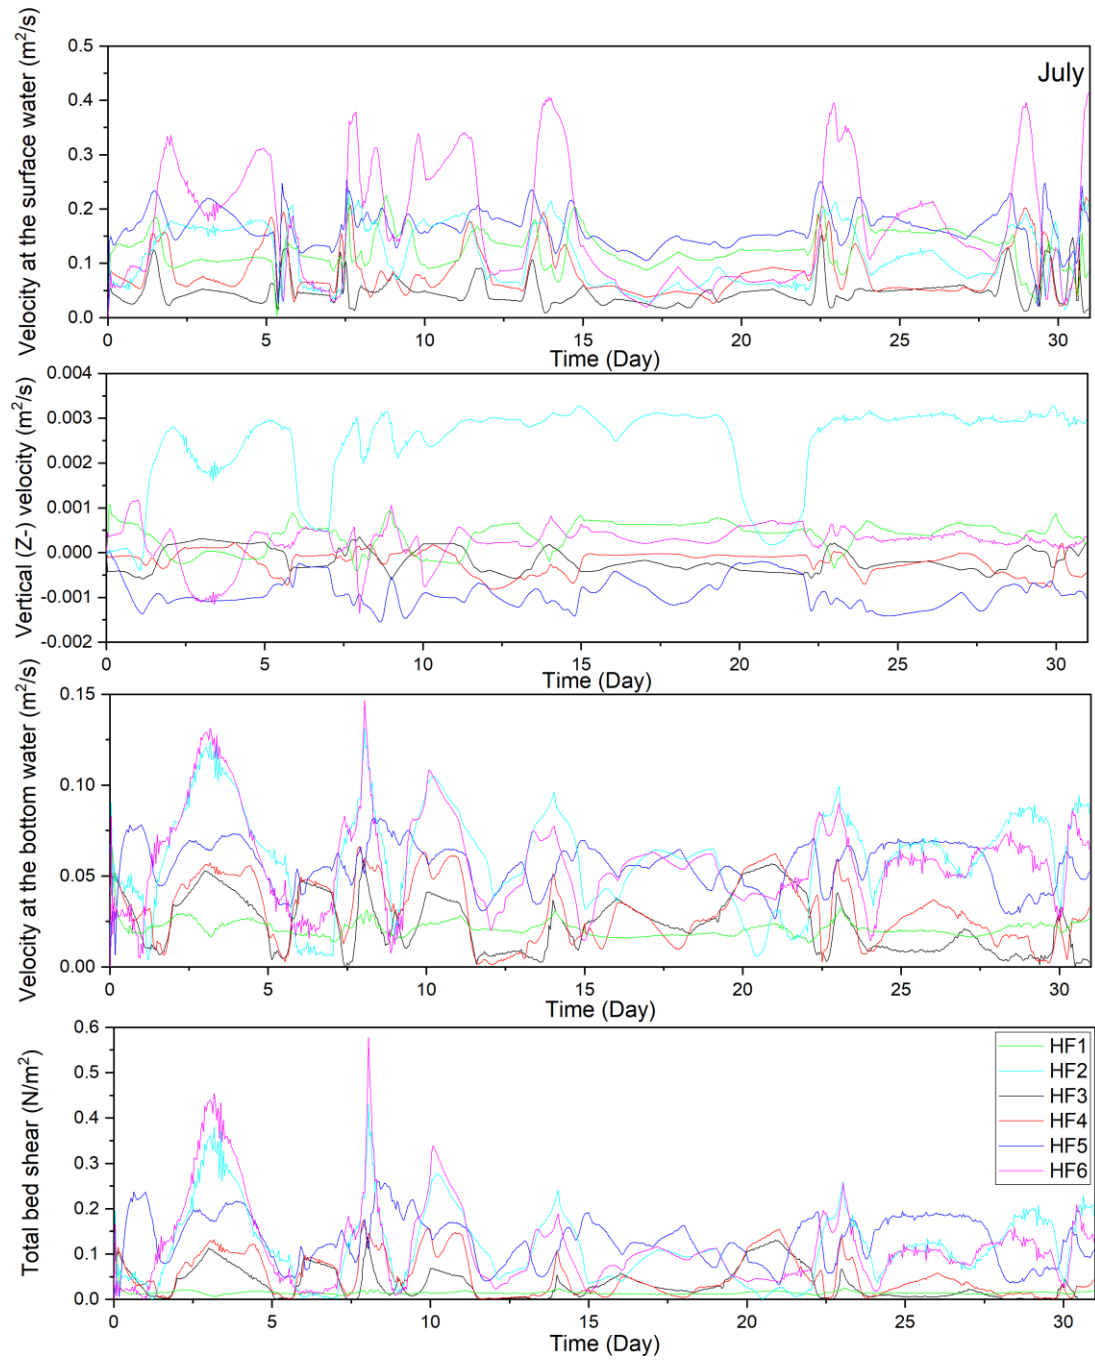

**Figure S10.** The simulated velocity magnitude of surface water, the vertical velocity, bottom water, and total bed shear in sample sites in July of LFY. The legend from top to bottom showed HF1~ 6 in turn.

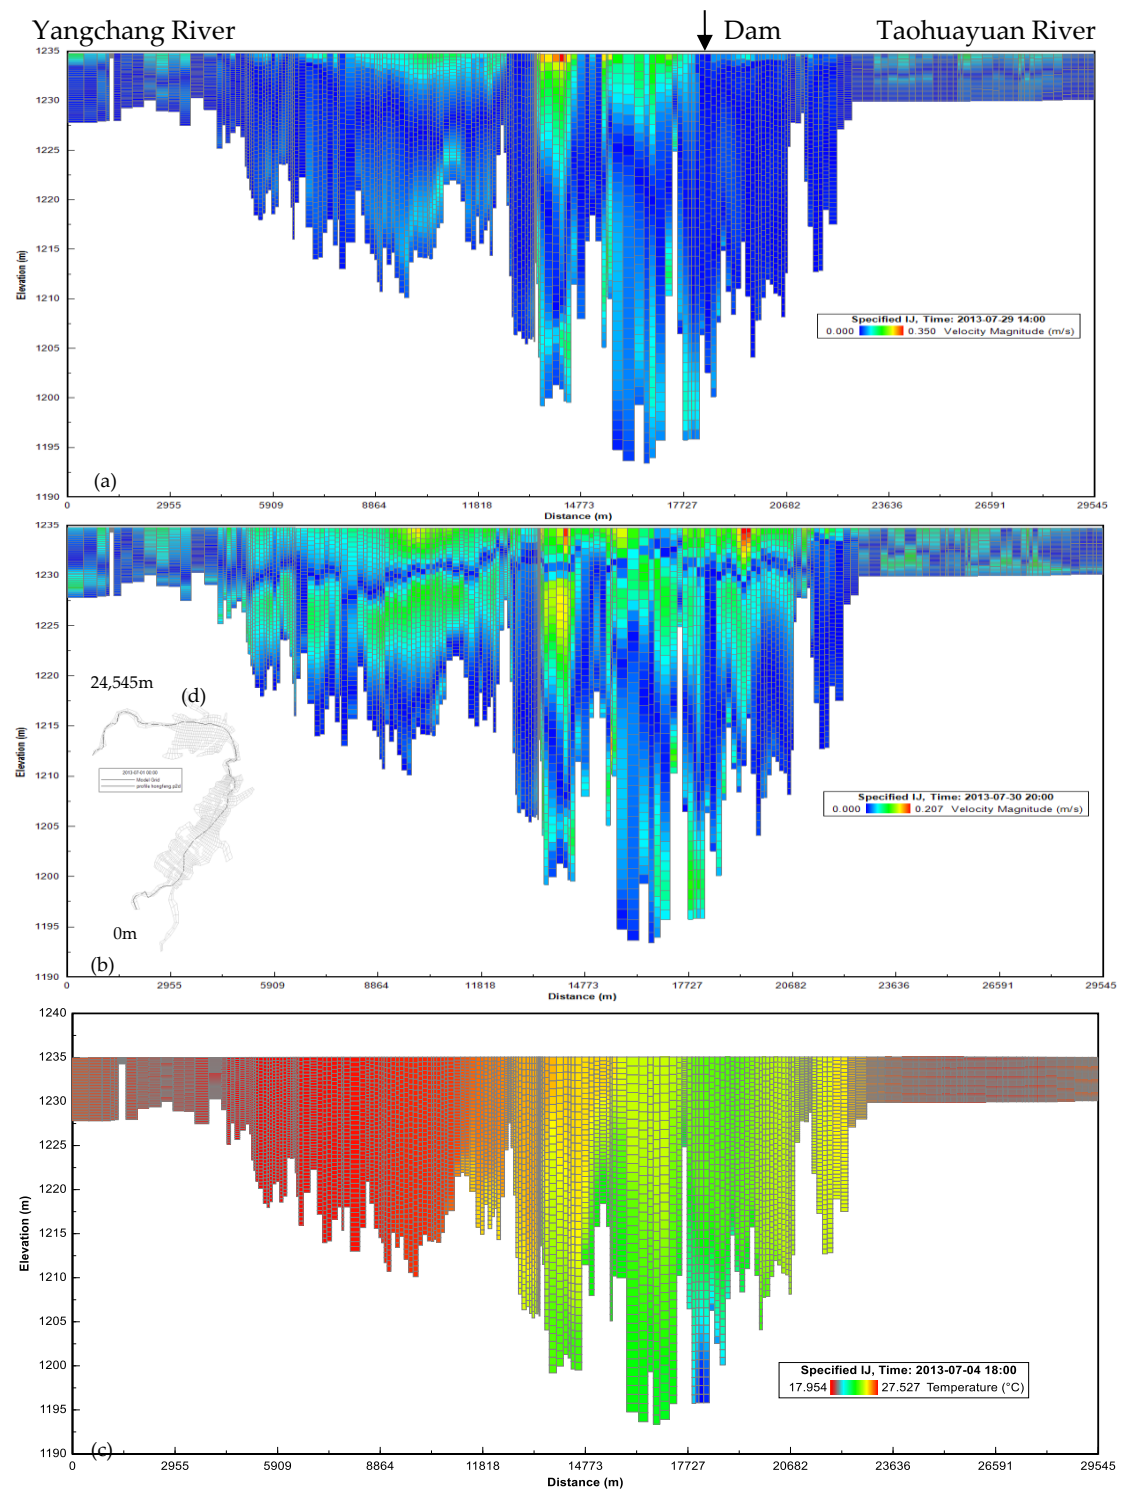

**Figure S11.** The water velocity (a) Day 14:00 29/07/ 2013; (b) Light 20:00 30/07/2013; (c) Temperature in the profiles of Hongfeng Lake; (d) The black line in Hongfeng Lake is the section.



## References

1. Hupfer, M.; Gächter, R.; Giovanoli, R. Transformation of phosphorus species in settling seston and during early sediment diagenesis. *Aquat. Sci.* **1995**, 57(4), 305-324, doi:10.1007/BF00878395.
2. Tessier, A.; Campbell, P.; Bisson, M. Sequential extraction procedure for the speciation of particulate trace metals. *Appl. Geochem.* **1979**, 51(7), 844-851, doi:10.1021/ac50043a017.
3. Murphy, J.; Riley, J. P. A modified single solution method for the determination of phosphate in natural waters. *Anal. Chim. Acta* **1962**, 27, 31-36, doi.org/10.1016/S0003-2670(00)88444-5.
4. SEPA, State Environmental Protection Administration. Water and Wastewater Monitoring. China Environmental Science Press, Beijing, China, **2002**, 246-284 (In Chinese).
5. Ding, S.; Sun, Q.; Xu, D.; Jia, F.; He, X.; Zhang, C. High-resolution simultaneous measurements of dissolved reactive phosphorus and dissolved sulfide: the first observation of their simultaneous release in sediments. *Environ. Sci. Technol.* **2002**, 46(15), 8297-8304, doi: 10.1021/es301134h.
6. Crank, J. Diffusion and chemical reaction. Mathematics of Diffusion, United States, Oxford university press, **1956**, 347.
7. Li, Y. H. and Gregory, S. Diffusion of ions in sea water and in deep-sea sediments. *Geochim. Cosmochim. Acta* **1974**, 38(5), 703-714, doi.org/10.1016/0016-7037(74)90145-8.
8. Fan, C.; Zhang, L.; Yang, L.; Huang, W. Simulation of internal loadings of nitrogen and phosphorus in a lake. *Oceanol. Limnol. Sin.* **2002**, 33(4), 370-378 (In Chinese).

9. Wang, Y. Biogeochemistry of nutrient elements (Carbon, Nitrogen and phosphorus) at sediment-water interface in Hongfeng Lake and Baihua Lake, Guizhou Province. Institute of Geochemistry, Chinese Academy of Sciences, PhD dissertation, **2001** (In Chinese).
10. Li, B.; Feng, X.; Chen, X.; Wang, Y.; Shen, Y.; Wu, Q. L. Abundant sediment organic matter potentially facilitates chemical iron reduction and surface water blackness in a Chinese deep lake. *Environ. Pollut.* **2021**, 272, 116002, doi: 10.1016/j.envpol.2020.116002.
11. Berner, R. A. Early diagenesis: a theoretical approach. Princeton University, Press, New Jersey, USA. **1980**.
12. Henrichs, S. M. and Reeburgh, W. S. Anaerobic mineralization of marine sediment organic matter: rates and the role of anaerobic processes in the oceanic economy. *Geomicrobiol. J.* **1987**, 5,191-237, doi.org/10.1080/01490458709385971.
13. Yu, S. Modeling Phosphorus Cycling in a summerally Stratified Reservoir (Fanshawe Reservoir, Ontario, Canada). University of Waterloo, Master's thesis, **2020**.
14. DSI LLC. User's Manual for EFDC\_Explorer 10: pre/post processor for the environmental fluid dynamics code. Guide. Available online: <https://eemodelingsystem.atlassian.net/wiki/spaces/EK/overview?homepageId=3407890> (accessed on 1 October 2021).
15. Zhang, P. An analysis of the influence of different flood volumes on the water temperature and layered structure of hongjiadu reservoir. *China Rural Water Hydropower* **2019**, 12,75-79,85 (In Chinese).
16. Yu, N. Carbon Burial Mechanism and Carbon Budget of Cascade Reservoirs in the Wujiang River. Shanghai University, Master's thesis, **2019** (In Chinese).

17. DHMWR, Department of Hydrology, Ministry of Water Resources. the People's Republic of China (P. R. China) Hydrological data of Changjiang river basin, Annual hydrological report P. R. China 2013 Volume 6, **2014** (In Chinese).
18. Li, Y.; Gong, R.; Craig, P. Numerical simulation and prediction of surface water environment- EFDC modeling technology and case training. Science press, Beijing, China, **2019** (In Chinese).
19. He, S.; Li C.; Pan, Z.; Luo, M.; Meng, W.; Mo, C.; Wang, F. Geochemistry and environmental quality assessment of Hongfeng Lake sediments, Guiyang City. *Geophy. Geochem. Explor.* **2012**, (2), 26 (In Chinese).
